# Supplementary material for: Magnetostructural D-Correlations and Their Impact on Single-Molecule Magnetism
Source: MDPI journal article supplement (doi:10.3390/inorganics11120452), 2023-11-23
Supplement: s1 [file s1]

## Supplementary information

Tab. S1. Review of the matrix elements between the atomic-term kets  $|l^n v L M_L S M_S\rangle^a$

### Electron repulsion operator

$$\hat{V}^{ee} = \left( \frac{e^2}{4\pi\epsilon_0} \right) \sum_i^n \sum_{j>i}^n \sum_{k=0}^\infty \left[ r_{>}^{-(k+1)} \cdot r_{<}^k \right] \sum_{q=-k}^{+k} (-1)^q \hat{C}_{-q}^k(1) \hat{C}_q^k(2)$$

with the Slater-Condon parameters  $F_{ll}^k = \left( \frac{e^2}{4\pi\epsilon_0} \right) \langle \alpha l, \alpha l | r_{>}^{-(k+1)} \cdot r_{<}^k | \alpha l, \alpha l \rangle$

or Racah parameters  $A = F_{dd}^0 - (49/441)F_{dd}^4$ ,  $B = F_{dd}^2/49 - (5/441)F_{dd}^4$ ,  $C = (35/441)F_{dd}^4$

- The matrix element is  $M_L$  - and  $M_S$  -independent

$$\langle l^n v L S M_L M_S | \hat{V}^{ee} | l^n v' L' S' M'_L M'_S \rangle = \langle l^n v L S | \hat{V}^{ee} | l^n v' L' S' \rangle \delta_{M_L, M'_L} \delta_{M_S, M'_S}$$

- Reduced matrix elements connect the terms of different seniority  $v$

$$\langle l^n v L S | \hat{V}^{ee} | l^n v' L' S' \rangle = \delta_{L, L'} \delta_{S, S'} \sum_{k=0,2,4} F_{ll}^k c^k(l^n v v' L S)$$

with the angular coefficients

$$c^k(l^n v v' L S) = \frac{1}{2} \langle l | \mathbf{C}^k | l \rangle^2 \cdot \left\{ \frac{1}{(2L+1)} \sum_{v'' L''} \langle l^n v L S | \mathbf{U}^k | l^n v'' L'' S \rangle \cdot \langle l^n v' L' S' | \mathbf{U}^k | l^n v'' L'' S \rangle - \frac{n}{2L+1} \delta_{v, v'} \right\}$$

$$c^0(l^n v v' L S) = \frac{n(n-1)}{2} \delta_{v, v'}$$

- Reduced matrix elements of the (orbital) unit tensor operator using the (genealogic) coefficients of fractional parentage  $G_{n-1, \text{children}}^{n, \text{parent}}$

$$\langle l^n v L S | \mathbf{U}^k | l^n v' L' S' \rangle = n \delta_{S, S'} (2L+1)^{1/2} (2L'+1)^{1/2} \cdot \sum_{v_1, L_1, S_1}^{\text{parents}} (G_{n-1, v_1 L_1 S_1}^{n, v L S})^* \cdot G_{n-1, v_1 L_1 S_1}^{n, v' L' S'} \cdot (-1)^{L_1 + L + l + k} \begin{Bmatrix} L & L' & k \\ l & l & L_1 \end{Bmatrix}$$

- Reduced matrix element of the Racah operator (rationalized spherical harmonics)

$$\langle l | \mathbf{C}^k | l' \rangle = (-1)^l [(2l+1)(2l'+1)]^{1/2} \begin{pmatrix} l & k & l' \\ 0 & 0 & 0 \end{pmatrix}$$

### Spin-orbit (one-electron) coupling operator

$$\hat{H}^{so} = \hbar^{-2} \sum_{i=1}^n \xi_i (\vec{l}_i \cdot \vec{s}_i) = \hbar^{-2} \xi_l \{ \mathbf{L}^1 \otimes \mathbf{S}^1 \}^0 = \hbar^{-2} \xi_l \mathbf{V}^{11}$$

- The matrix element is  $M_L$  - and  $M_S$  -dependent

$$\begin{aligned} & \langle l^n v L S M_L M_S | \kappa \hat{H}^{so} | l^n v' L' S' M'_L M'_S \rangle \\ &= \kappa \xi_l \langle l | \mathbf{L}^1 | l \rangle \cdot \langle l^n v L S M_L M_S | -\mathbf{V}_{-1, +1}^{11} + \mathbf{V}_{0, 0}^{11} - \mathbf{V}_{+1, -1}^{11} | l^n v' L' S' M'_L M'_S \rangle \hbar^{-2} \end{aligned}$$

- Individual spherical components

$$\begin{aligned} & \langle l^n v L S M_L M_S | \mathbf{V}_{q, r}^{11} | l^n v' L' S' M'_L M'_S \rangle \\ &= \langle l^n v L S | \mathbf{V}^{11} | l^n v' L' S' \rangle \cdot (-1)^{L-M_L} \cdot \begin{pmatrix} L & 1 & L' \\ -M_L & q & M'_L \end{pmatrix} \cdot (-1)^{S-M_S} \cdot \begin{pmatrix} S & 1 & S' \\ -M_S & r & M'_S \end{pmatrix} \end{aligned}$$

- Reduced matrix element of the double tensor (orbit-spin) operator between the atomic-term kets
$$\langle l^n v L S \| \mathbf{V}^{11} \| l^n v' L' S' \rangle = \hbar^2 n [s(s+1)(2s+1)]^{1/2} [(2L+1)(2L'+1)]^{1/2} [(2S+1)(2S'+1)]^{1/2} \\ \cdot \sum_{\substack{\text{parents} \\ v_1, L_1, S_1}} (-1)^{L_1+S_1+L+S+l+s} (G_{n-1, v_1 L_1 S_1}^{n, v L S})^* \cdot G_{n-1, v_1 L_1 S_1}^{n, v' L' S'} \cdot \begin{Bmatrix} L & L' & 1 \\ l & l & L_1 \end{Bmatrix} \cdot \begin{Bmatrix} S & S' & 1 \\ s & s & S_1 \end{Bmatrix}$$

### Orbital and spin Zeeman operator

$$\hat{H}^Z = \mu_B \hbar^{-1} \sum_{i=1}^n (\kappa \vec{l}_i + g_e \vec{s}_i) \cdot \vec{B} = \mu_B \hbar^{-1} \sum_{q=-1}^{+1} (-1)^q \mathbf{B}_{-q}^1 (\kappa_q \mathbf{L}_q^1 + g_e \mathbf{S}_q^1)$$

- The orbital Zeeman interaction is  $M_S$ -independent

$$\langle l^n v L S M_L M_S | \hbar^{-1} \mu_B \kappa (\vec{B} \cdot \vec{L}) | l^n v' L' S' M'_L M'_S \rangle = \delta_{v, v'} \delta_{L, L'} \delta_{S, S'} \delta_{M_S, M'_S} [L(L+1)(2L+1)]^{1/2} (-1)^{L-M_L} \mu_B \\ \cdot [-\mathbf{B}_{+1}^1 \begin{pmatrix} L & 1 & L' \\ -M_L & -1 & M'_L \end{pmatrix} \kappa_{-1} + \mathbf{B}_0^1 \begin{pmatrix} L & 1 & L' \\ -M_L & 0 & M'_L \end{pmatrix} \kappa_0 - \mathbf{B}_{-1}^1 \begin{pmatrix} L & 1 & L' \\ -M_L & +1 & M'_L \end{pmatrix} \kappa_{+1}]$$

- The spin Zeeman interaction is  $M_L$ -independent

$$\langle l^n v L S M_L M_S | \hbar^{-1} \mu_B g_e (\vec{B} \cdot \vec{S}) | l^n v' L' S' M'_L M'_S \rangle = \delta_{v, v'} \delta_{L, L'} \delta_{S, S'} \delta_{M_L, M'_L} [S(S+1)(2S+1)]^{1/2} (-1)^{S-M_S} \mu_B g_e \\ \cdot [-\mathbf{B}_{+1}^1 \begin{pmatrix} S & 1 & S' \\ -M_S & -1 & M'_S \end{pmatrix} + \mathbf{B}_0^1 \begin{pmatrix} S & 1 & S' \\ -M_S & 0 & M'_S \end{pmatrix} - \mathbf{B}_{-1}^1 \begin{pmatrix} S & 1 & S' \\ -M_S & +1 & M'_S \end{pmatrix}]$$

- Spherical transforms of the magnetic induction

$$\mathbf{B}_{+1}^1 = -(1/\sqrt{2})(B_x + iB_y), \quad \mathbf{B}_{-1}^1 = +(1/\sqrt{2})(B_x - iB_y), \quad \mathbf{B}_0^1 = B_z$$

### Crystal field operator

$$\hat{V}^{\text{cf}} = \left( \frac{e^2}{4\pi\epsilon_0} \right) \sum_{i=1}^n \sum_{K=1}^N z_K \sum_{k=0,2,4}^{2l} \left[ r_{>}^{-(k+1)} \cdot r_{<}^k \right] \sum_{q=-k}^{+k} (-1)^q \hat{C}_{-q}^k(K) \hat{C}_q^k(i) = \sum_{k=0,2,4}^{2l} \sum_{q=-k}^{+k} a_q^k \cdot \hat{U}_q^k$$

$$\text{with the crystal field parameters } F_k(R_K) = \left( \frac{e^2}{4\pi\epsilon_0} \right) \langle r_{>}^{-(k+1)} \cdot r_{<}^k \rangle \approx \left( \frac{e^2}{4\pi\epsilon_0} \right) R_K^{-(k+1)} \cdot \langle r^k \rangle$$

$$\text{and the potential constants } a_q^k = \langle l \| \mathbf{C}^k \| l \rangle \sum_{K=1}^N z_K F_k(R_K) \cdot (-1)^q \hat{C}_{-q}^k(\mathcal{Q}_K, \varphi_K)$$

$$\text{with the values of the spherical harmonics } (-1)^q \hat{C}_{-q}^k(\mathcal{Q}_K, \varphi_K) = \sqrt{4\pi/(2k+1)} \cdot Y_{k,q}^*(\mathcal{Q}_K, \varphi_K)$$

- The matrix element is  $M_S$ -independent

$$\langle l^n v L S M_L M_S | \hat{V}^{\text{cf}} | l^n v' L' S' M'_L M'_S \rangle = \delta_{S, S'} \delta_{M_S, M'_S} \sum_{k=0,2,4}^{2l} \sum_{q=-k}^{+k} a_q^k \cdot \langle l^n v L S M_L | \hat{U}_q^k | l^n v' L' S' M'_L \rangle$$

- Reduction according to the Wigner-Eckert theorem

$$\langle l^n v L S M_L | \hat{U}_q^k | l^n v' L' S' M'_L \rangle = (-1)^{L-M_L} \begin{pmatrix} L & k & L' \\ -M_L & q & M'_L \end{pmatrix} \cdot \langle l^n v L S \| \mathbf{U}^k \| l^n v' L' S' \rangle$$

- The matrix elements  $\langle l^n v L S \| \mathbf{U}^k \| l^n v' L' S' \rangle$  and  $\langle l \| \mathbf{C}^k \| l' \rangle$  as above (see electron repulsion).

<sup>a</sup> The formulae require  $l = 2$ ,  $s = 1/2$ .

Tab. S2. Energy level diagrams [cm<sup>-1</sup>] for selected d<sup>n</sup> systems; not to scale.

d<sup>2</sup> system – V(III)

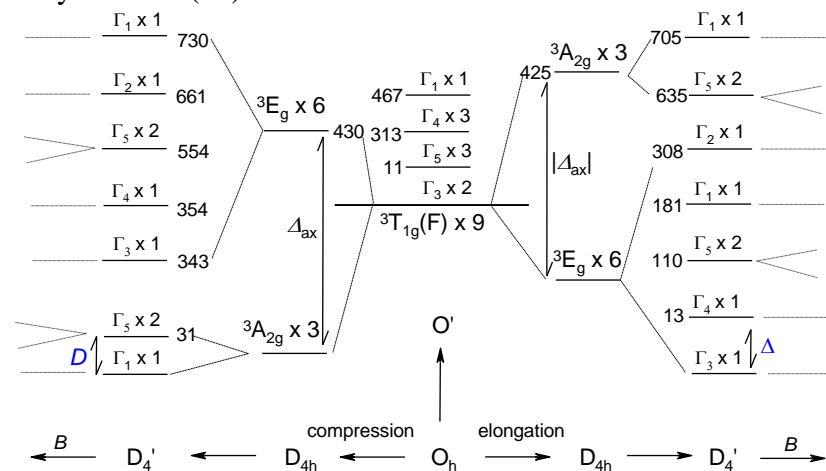

d<sup>3</sup> system – Cr(III)

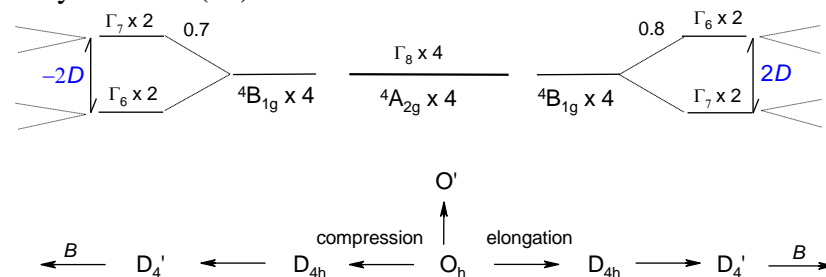

d<sup>4</sup> system – Mn(III)

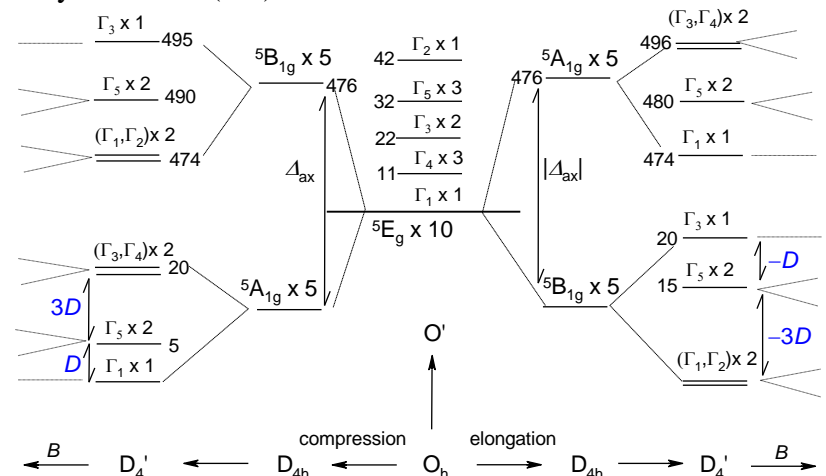

high-spin d<sup>6</sup> system – Fe(II)

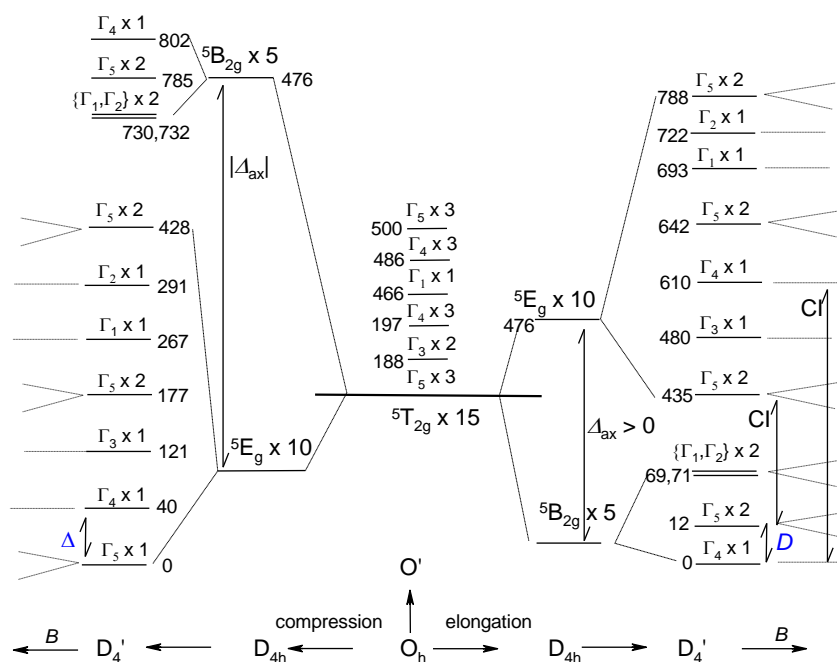

### high-spin $d^7$ system – Co(II)

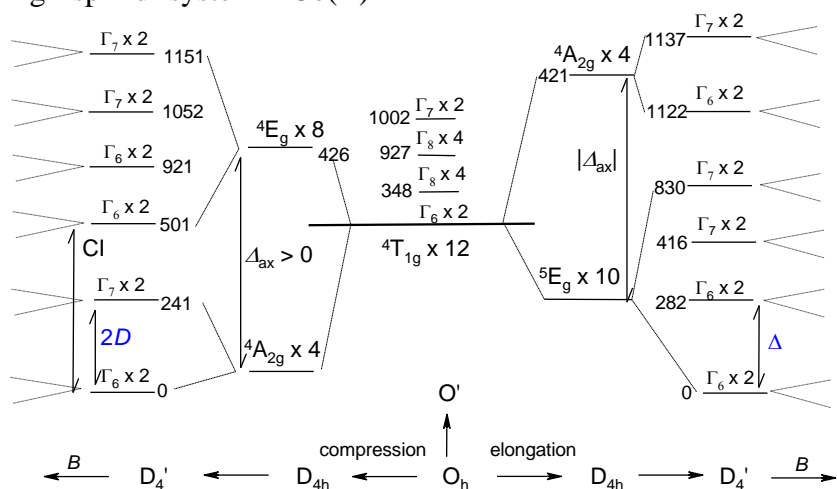

### $d^8$ system – Ni(II)

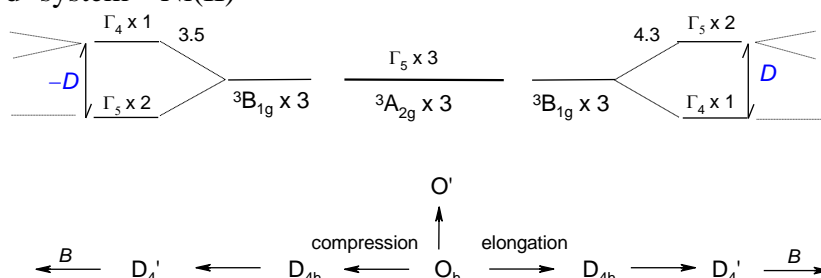

Tab. S3. HEXAcoordinate Ni(II) complexes: structural and magnetic parameters [pm, cm<sup>-1</sup>]

| No |   | Chromophore                                       | Cluster | Compound                                                                                                  | $g_x$ | $g_y$ | $g_z$ | $g_{xy}$ | $g_z - g_{xy}$   | $E$  | $E_{\text{str}}$ | $D$   | $D_{\text{str}}$ |
|----|---|---------------------------------------------------|---------|-----------------------------------------------------------------------------------------------------------|-------|-------|-------|----------|------------------|------|------------------|-------|------------------|
|    |   | Abbr. →                                           |         |                                                                                                           |       |       | $g_z$ | $g_{xy}$ | $g_{\text{dif}}$ |      |                  | $D$   | $D_{\text{str}}$ |
| 1  | A | {NiN <sub>2</sub> O <sub>2</sub> O <sub>2</sub> } | 1       | [Ni(pydicar)(pymeoh)]·H <sub>2</sub> O                                                                    | 2.169 | 2.169 | 2.478 | 2.169    | 0.309            | 0.13 | 1.1              | -12.7 | -24.35           |
| 2  | B | {NiN <sub>2</sub> O <sub>2</sub> O <sub>2</sub> } | 2       | [Ni(2Meiz) <sub>2</sub> (fm) <sub>2</sub> (H <sub>2</sub> O) <sub>2</sub> ]                               | 2.000 | 2.001 | 2.038 | 2.000    | 0.038            | 0.07 | 1.1              | -6.00 | -10.13           |
| 3  | C | {NiN <sub>4</sub> N <sub>2</sub> }                | 2       | [Ni(bzimpy) <sub>2</sub> ](ClO <sub>4</sub> ) <sub>2</sub>                                                | 2.120 | 2.120 | 2.149 | 2.120    | 0.029            | 0    | 0                | -4.63 | -10.05           |
| 4  | D | {NiN <sub>2</sub> O <sub>2</sub> O <sub>2</sub> } | 3       | [Ni(MeSnic) <sub>2</sub> (fupy) <sub>2</sub> (H <sub>2</sub> O) <sub>2</sub> ]                            | 2.241 | 2.241 | 2.279 | 2.241    | 0.038            | 0    | 0                | -4.98 | -7.90            |
| 5  | E | {NiN <sub>2</sub> O <sub>2</sub> O <sub>2</sub> } | 3       | [Ni(MeSnic) <sub>2</sub> (lut) <sub>2</sub> (H <sub>2</sub> O) <sub>2</sub> ]                             | 2.199 | 2.199 | 2.249 | 2.199    | 0.050            | 0    | 0                | -7.84 | -7.40            |
| 6  | F | {NiN <sub>2</sub> O <sub>2</sub> O <sub>2</sub> } | 2       | [Ni(Me <sub>2</sub> iz) <sub>2</sub> (fm) <sub>2</sub> (H <sub>2</sub> O) <sub>2</sub> ]                  | 2.139 | 2.140 | 2.190 | 2.140    | 0.050            | 0.08 | 1.9              | -7.70 | -6.25            |
| 7  | G | {NiN <sub>6</sub> }                               | 2       | [Ni(iz) <sub>6</sub> ](fm) <sub>2</sub>                                                                   | 2.029 | 2.029 | 2.051 | 2.029    | 0.022            | 0.08 | 0                | -3.43 | -5.165           |
| 8  | H | {NiN <sub>2</sub> O <sub>2</sub> O <sub>2</sub> } | 2       | [Ni(iqu) <sub>2</sub> (ac) <sub>2</sub> (H <sub>2</sub> O) <sub>2</sub> ]                                 | 2.105 | 2.106 | 2.139 | 2.106    | 0.033            | 0.08 | 1.4              | -5.30 | -4.97            |
| 9  | I | {NiN <sub>4</sub> N <sub>2</sub> }                | 3       | [Ni(Me <sub>2</sub> fupy) <sub>4</sub> (NCS) <sub>2</sub> ]-6.6H <sub>2</sub> O                           | 2.294 | 2.294 | 2.305 | 2.294    | 0.011            | 0    | 0                | -1.65 | -4.3             |
| 10 | J | {NiN <sub>2</sub> O <sub>2</sub> O <sub>2</sub> } | 3       | [Ni(Mefupy) <sub>2</sub> (ac) <sub>2</sub> (H <sub>2</sub> O) <sub>2</sub> ]                              | 2.187 | 2.190 | 2.208 | 2.189    | 0.019            | 0.23 | 1.7              | -3.17 | -3.70            |
| 11 | K | {NiN <sub>2</sub> O <sub>2</sub> O <sub>2</sub> } | 3       | [Ni(bzfupy) <sub>2</sub> (ac) <sub>2</sub> (H <sub>2</sub> O) <sub>2</sub> ]                              | 2.200 | 2.203 | 2.219 | 2.202    | 0.017            | 0.24 | 0.7              | -2.85 | -2.85            |
| 12 | L | {NiN <sub>4</sub> N <sub>2</sub> }                | 3       | [Ni(Mefupy) <sub>4</sub> (NCS) <sub>2</sub> ]-1.29H <sub>2</sub> O                                        | 2.201 | 2.201 | 2.213 | 2.201    | 0.012            | 0    | 0                | -1.93 | -2.60            |
| 13 | M | {NiN <sub>2</sub> O <sub>2</sub> O <sub>2</sub> } | 2       | [Ni(fupy) <sub>2</sub> (ac) <sub>2</sub> (H <sub>2</sub> O) <sub>2</sub> ]                                | 2.147 | 2.149 | 2.179 | 2.148    | 0.031            | 0.15 | 1.0              | -5.00 | -2.32            |
| 14 | N | {NiN <sub>4</sub> N <sub>2</sub> }                | 3       | [Ni(iqu) <sub>4</sub> (NCS) <sub>2</sub> ]-CH <sub>2</sub> Cl <sub>2</sub>                                | 2.188 | 2.188 | 2.178 | 2.188    | -0.010           | 0    | 0                | -1.54 | -0.70            |
| 15 | O | {NiN <sub>6</sub> }                               | 4       | [Ni(iz) <sub>6</sub> ](Clac) <sub>2</sub>                                                                 | 2.154 | 2.154 | 2.154 | 2.154    | 0.000            | 0    | 0                | 0     | -0.250           |
| 16 | P | {NiN <sub>4</sub> N <sub>2</sub> }                | 5       | [Ni(dien)(mea){Ni(CN) <sub>4</sub> }]                                                                     | 2.077 | 2.077 | 2.050 | 2.077    | -0.027           | 0    | 0                | 4.19  | 2.02             |
| 17 | Q | {NiN <sub>6</sub> }                               | 4       | [Ni(iz) <sub>6</sub> ](Clprop) <sub>2</sub>                                                               | 2.155 | 2.155 | 2.150 | 2.155    | -0.005           | 0    | 0                | 0.90  | 2.025            |
| 18 | R | {NiN <sub>6</sub> }                               | 5       | [Ni(aepn) <sub>2</sub> ][Ni(CN) <sub>4</sub> ]-H <sub>2</sub> O                                           | 2.080 | 2.080 | 2.073 | 2.080    | -0.007           | 0    | 0                | 0.99  | 2.125            |
| 19 | S | {NiN <sub>4</sub> N <sub>2</sub> }                | 4       | [Ni(fupy) <sub>4</sub> (NCS) <sub>2</sub> ]-THF                                                           | 2.199 | 2.200 | 2.180 | 2.200    | -0.020           | 0.11 | 0                | 2.70  | 2.80             |
| 20 | T | {NiN <sub>4</sub> N <sub>2</sub> }                | 4       | [Ni(bzfupy) <sub>4</sub> (NCS) <sub>2</sub> ]-2H <sub>2</sub> O                                           | 2.227 | 2.227 | 2.219 | 2.227    | -0.008           | 0    | 0                | 1.15  | 2.95             |
| 21 | U | {NiN <sub>6</sub> }                               | 4       | [Ni(Meiz) <sub>6</sub> ](Cl) <sub>2</sub> -2H <sub>2</sub> O                                              | 2.185 | 2.185 | 2.173 | 2.185    | -0.012           | 0    | 0                | 1.96  | 3.510            |
| 22 | W | {NiN <sub>4</sub> O <sub>2</sub> }                | 4       | [Ni(pz) <sub>4</sub> (ac) <sub>2</sub> ]                                                                  | 2.170 | 2.170 | 2.146 | 2.170    | -0.024           | 0    | 0.4              | 3.88  | 6.65             |
| 23 | X | {NiO <sub>4</sub> O <sub>2</sub> }                | 4       | [Ni(H <sub>2</sub> O) <sub>4</sub> (MeSnic) <sub>2</sub> ]-4H <sub>2</sub> O                              | 2.351 | 2.351 | 2.180 | 2.351    | -0.171           | 0    | 0                | 4.39  | 8.60             |
| 24 | Y | {NiN <sub>4</sub> O <sub>2</sub> }                | 5       | [Ni(Me <sub>2</sub> iz) <sub>4</sub> (H <sub>2</sub> O) <sub>2</sub> ]-Cl <sub>2</sub> -3H <sub>2</sub> O | 2.126 | 2.126 | 2.079 | 2.126    | -0.047           | 0    | 0.7              | 7.42  | 11.35            |
| 25 | Z | {NiN <sub>4</sub> O <sub>2</sub> }                | 5       | [Ni(L <sub>NN</sub> ) <sub>2</sub> (H <sub>2</sub> O) <sub>2</sub> ]                                      | 2.103 | 2.159 | 2.000 | 2.131    | -0.131           | 1.46 | 3.1              | 11.23 | 15.5             |

Formulae for structural tetragonality (rhombicity):  $D_{\text{str}} = A_z - (A_y + A_x)/2$ ,  $E_{\text{str}} = (A_y - A_x)/2$ ,  $A_a = (R_a - \bar{R}_a)$ . Mean distances:  $\bar{d}(\text{Ni}-\text{N}) = 2.145$ ,  $\bar{R}(\text{Ni}-\text{NCS}) = 2.070$ ,  $\bar{d}(\text{Ni}-\text{O}) = 2.055$  Å. Magnetic  $E$ -values are only tentative.

Abbreviations of ligands: fm<sup>-</sup> = formato, ac<sup>-</sup> = acetato, Clac<sup>-</sup> = chloroacetato, Clprop<sup>-</sup> = 2-chloropropionato, MeSnic<sup>-</sup> = 2-methyl-sulfanyl-nicotinato, pydicar<sup>-</sup> = pyridine-2,6-dicarboxylato, iz = imidazole, Meiz = 1-methylimidazole, 2Meiz = 2-methylimidazole, 1,2-Me<sub>2</sub>iz = 1,2-dimethylimidazole, pz = pyrazole, iqu = *iso*-quinoline, fupy = furo[3,2-c]pyridine, Mefupy = 2-methylfuro[3,2-c]pyridine, Me<sub>2</sub>fupy = 2,3-dimethylfuro[3,2-c]pyridine, bzfupy = benzo[4,5]furo[3,2-c]pyridine, pymeoh = 2,6-bis(hydroxymethyl)pyridine, lut = 3,5-lutidine.

Correlation coefficients between variables using 25 datapoints for hexacoordinate Ni(II) complexes

|      | D       | Dstr    | gz     | gxy     |
|------|---------|---------|--------|---------|
| Dstr | 0.9485  |         |        |         |
| gz   | -0.5997 | -0.6184 |        |         |
| gxy  | 0.0957  | 0.1435  | 0.6002 |         |
| gdif | -0.8241 | -0.8918 | 0.6630 | -0.2008 |

Component weights (PCA analysis) for hexacoordinate Ni(II) complexes

|      | Component 1 | Component 2 |
|------|-------------|-------------|
| D    | 0.517       | 0.123       |
| Dstr | 0.530       | 0.152       |
| gz   | -0.430      | 0.501       |
| gxy  | -0.012      | 0.827       |
| gdif | -0.515      | -0.159      |

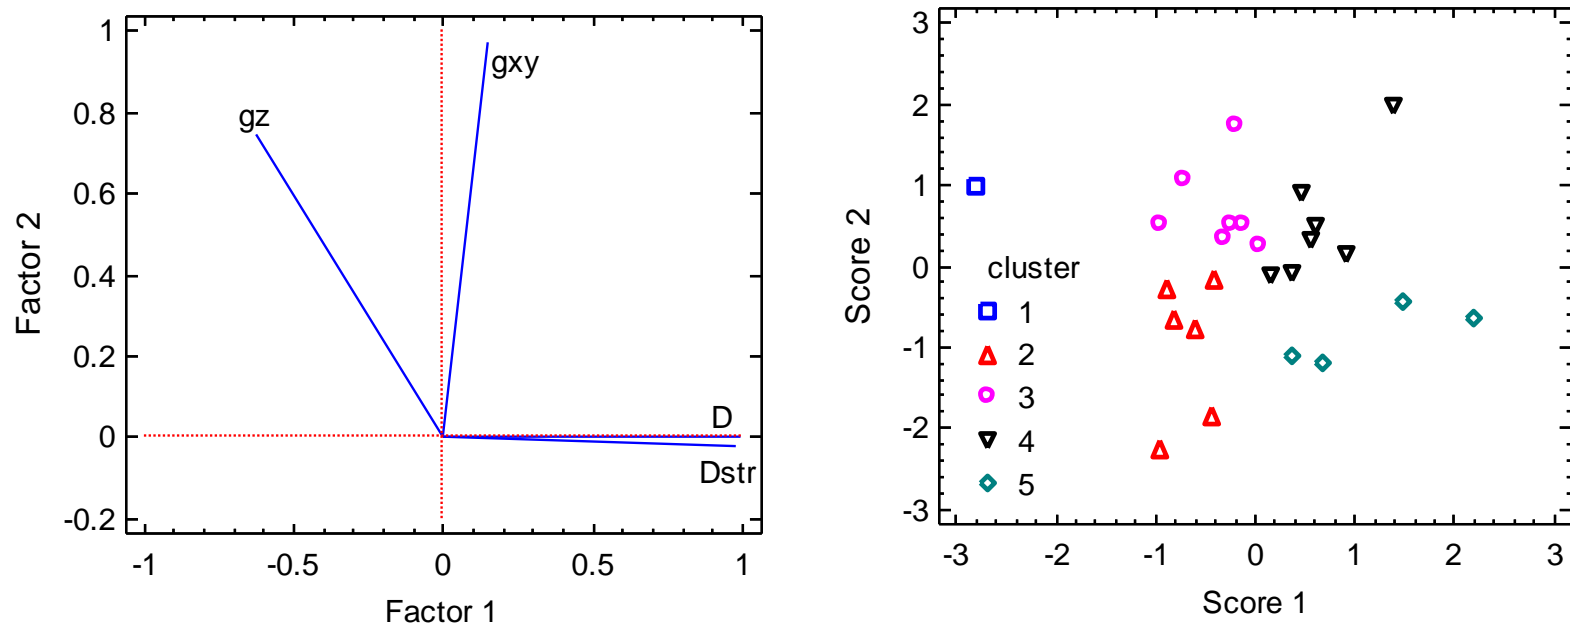

Fig. S1. FA biplot after varimax rotation for hexacoordinate Ni(II) complexes. The points are the individual objects.

Tab. S4. HEXAcoordinate Co(II) complexes: structural and magnetic parameters [pm, cm<sup>-1</sup>]

| No |   | Chromophore                                       | Cluster | Compound                                                                                       | $g_x$ | $g_y$ | $g_{xy}$ | $E$  | $E_{str}$ | $2D$  | $D$   | $D_{str}$ |
|----|---|---------------------------------------------------|---------|------------------------------------------------------------------------------------------------|-------|-------|----------|------|-----------|-------|-------|-----------|
|    |   | Abbr. →                                           |         |                                                                                                |       |       | $g_{xy}$ |      |           | D2    |       | Dstr      |
| 1  | A | {CoN <sub>2</sub> O <sub>2</sub> O <sub>2</sub> } | 1       | [Co(MeIz) <sub>2</sub> (ac) <sub>2</sub> (H <sub>2</sub> O) <sub>2</sub> ]                     | 2.530 | 2.530 | 2.530    | 0    | 2.42      | 190.0 | 95.0  | -11.87    |
| 2  | B | {CoO <sub>4</sub> O <sub>2</sub> }                | 1       | [Co(2OHnic) <sub>2</sub> (H <sub>2</sub> O) <sub>2</sub> ]                                     | 2.670 | 2.730 | 2.700    | 0.26 | 0.10      | 159.8 | 79.91 | -9.40     |
| 3  | C | {CoN <sub>2</sub> O <sub>2</sub> O <sub>2</sub> } | 1       | [Co(bylim) <sub>2</sub> (bz) <sub>2</sub> (H <sub>2</sub> O) <sub>2</sub> ]                    | 2.510 | 2.620 | 2.565    | 0.55 | 1.25      | 158.0 | 79.0  | -9.25     |
| 4  | D | {CoN <sub>2</sub> O <sub>2</sub> O <sub>2</sub> } | 1       | [Co(pic) <sub>2</sub> (H <sub>2</sub> O) <sub>2</sub> ]                                        | 2.650 | 2.720 | 2.685    | 2.34 | 3.55      | 168.5 | 84.24 | -8.45     |
| 5  | E | {CoN <sub>2</sub> O <sub>2</sub> O <sub>2</sub> } | 1       | [Co(MeSnic) <sub>2</sub> (Me <sub>2</sub> fupy) <sub>2</sub> (H <sub>2</sub> O) <sub>2</sub> ] | 2.740 | 2.610 | 2.675    | 1.39 | 2.35      | 199.1 | 99.54 | -7.55     |
| 6  | F | {CoN <sub>2</sub> O <sub>2</sub> O <sub>2</sub> } | 1       | [Co(bz) <sub>2</sub> (nca) <sub>2</sub> (H <sub>2</sub> O) <sub>2</sub> ]                      | 3.118 | 3.118 | 3.118    | 0    | 2.95      | 211.6 | 105.8 | -6.65     |
| 7  | G | {CoN <sub>6</sub> }                               | 1       | [Co(iz) <sub>6</sub> ](HCOO) <sub>2</sub>                                                      | 2.753 | 2.753 | 2.753    | 0    | 0.71      | 190.0 | 95.00 | -6.10     |
| 8  | H | {CoN <sub>2</sub> O <sub>2</sub> O <sub>2</sub> } | 2       | [Co(iqu) <sub>2</sub> (ac) <sub>2</sub> (H <sub>2</sub> O) <sub>2</sub> ]                      | 2.587 | 2.689 | 2.638    | 3.01 | 1.80      | 167.9 | 83.96 | -2.80     |
| 9  | I | {CoN <sub>2</sub> O <sub>2</sub> O <sub>2</sub> } | 2       | [Co(pybzfupy) <sub>2</sub> (ac) <sub>2</sub> (H <sub>2</sub> O) <sub>2</sub> ]                 | 2.607 | 2.758 | 2.683    | 2.84 | 1.50      | 179.2 | 89.59 | -2.30     |
| 10 | J | {CoN <sub>2</sub> O <sub>2</sub> O <sub>2</sub> } | 2       | [Co(bzfupy) <sub>2</sub> (ac) <sub>2</sub> (H <sub>2</sub> O) <sub>2</sub> ]                   | 2.613 | 2.801 | 2.707    | 6.90 | 1.10      | 206.0 | 103.0 | -0.80     |
| 11 | K | cis{CoN <sub>4</sub> N <sub>2</sub> }             | 1       | $\alpha$ -cis-[Co(phen) <sub>2</sub> (dca) <sub>2</sub> ]                                      | 2.596 | 2.596 | 2.596    | 0    | 0         | 169.6 | 84.8  | -7.80     |
| 12 | L | cis{CoN <sub>4</sub> N <sub>2</sub> }             | 1       | $\beta$ -cis-[Co(phen) <sub>2</sub> (dca) <sub>2</sub> ]                                       | 2.657 | 2.657 | 2.657    | 0    | 0         | 198.2 | 99.1  | -6.90     |
| 13 | M | cis{CoN <sub>4</sub> N <sub>2</sub> }             | 2       | [Co(phen) <sub>3</sub> ](tcm) <sub>2</sub>                                                     | 2.594 | 2.594 | 2.594    | 0    | 0         | 158.6 | 79.3  | -1.00     |
| 14 | N | cis{CoN <sub>4</sub> N <sub>2</sub> }             | 2       | [{Co(phen) <sub>2</sub> tcm} <sub>2</sub> $\mu^2$ -tcm]tcm·H <sub>2</sub> O                    | 2.673 | 2.673 | 2.673    | 0    | 0         | 188.8 | 94.4  | -1.60     |
| 15 | O | cis{CoN <sub>2</sub> N <sub>4</sub> }             | 2       | catena-[Co(bpy)(dca) <sub>2</sub> ]                                                            | 2.438 | 2.438 | 2.438    | 0    | 0         | 203.2 | 101.6 | -1.10     |
| 16 | P | cis{CoN <sub>2</sub> N <sub>4</sub> }             | 2       | catena-[Co(bpy)(tcm) <sub>2</sub> ]                                                            | 2.633 | 2.633 | 2.633    | 0    | 0         | 206.4 | 103.2 | -0.70     |

$g_z = 2.0$  – fixed. Mean distances  $\bar{R}(\text{Co} - \text{N}) = 2.185$ ,  $\bar{R}(\text{Co} - \text{O}) = 2.085$ , and  $\bar{R}(\text{Co} - \text{Cl}) = 2.475$  Å.

Abbreviations for ligands: fm<sup>-</sup> = formato, ac = acetato<sup>-</sup>, bz<sup>-</sup> = benzoato, pic<sup>-</sup> = picolinato, MeSnic = 2-methylthionicotinato<sup>-</sup>, 2OHnic = 2-hydroxynicotinato<sup>-</sup>, dca<sup>-</sup> = dicyanoamide, tcm<sup>-</sup> = tricyanomethanide, iz = 1H-imidazole, bzfupy = benzofuro[3,2-c]pyridine, bylim = 1-phenyl-1H-imidazole, iqu = *iso*-quinoline, Meiz = methylimidazole, Me<sub>2</sub>fupy = 2,3-dimethylfuro[3,2-c]pyridine, pybzfupy = 1-(pyridine-3-yl)benzofuro[3,2-c]pyridine, nca = nicotinamide, L = 2-[(2,2-diphenylethylimino)methyl]pyridine-1-oxide, phen = 1,10-phenanthroline, bpy = 4,4'-bipyridine, ampy = aminopyrimidine, abpt = 4-amino-3,5-bis(2-pyridyl)-1,2,4-triazole.



Correlation coefficients using 16 datapoints

|      | D2     | Dstr    | gxy |
|------|--------|---------|-----|
| D2   |        |         |     |
| Dstr | 0.2718 |         |     |
| gxy  | 0.3159 | -0.0805 |     |

Component weights (PCA analysis)

|      | Component 1 | Component 2 |
|------|-------------|-------------|
| gxy  | 0.527       | -0.647      |
| D2   | 0.739       | 0.031       |
| Dstr | 0.418       | 0.761       |

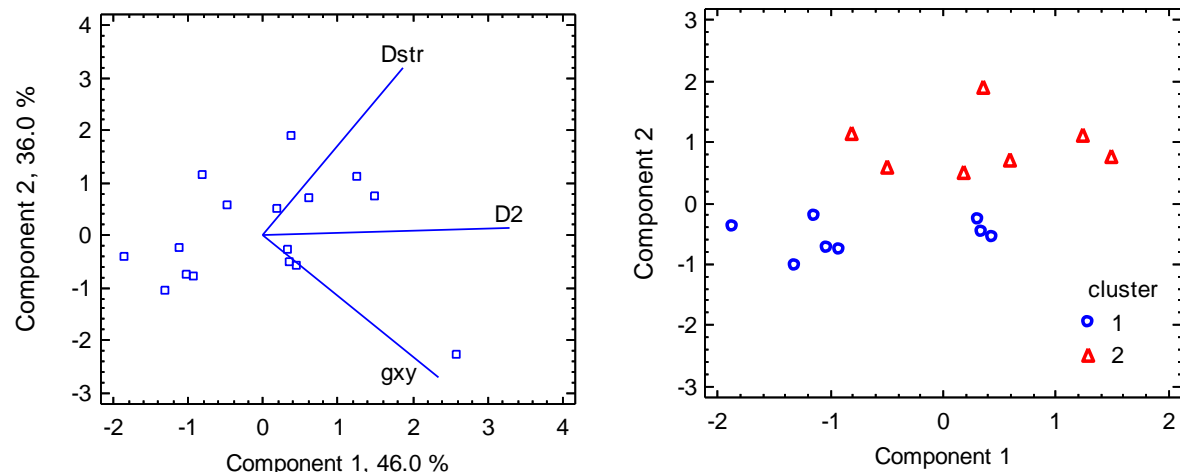

Fig. S2. PCA biplot for hexacoordinate Co(II) complexes. The points are the individual objects.

Tab. S5. TETRacoordinate Co(II) complexes: structural and magnetic parameters [ $\text{\AA}$ , deg,  $\text{cm}^{-1}$ ]

| No | Compound                                              | Chromophore<br>{CoA <sub>2</sub> B <sub>2</sub> } |                 | <i>R</i> (Co-A) | <i>R</i> (Co-B) | $\alpha$ (A-Co-A) | $\beta$ (B-Co-B) | Magnetic data |                      |                      |                      | HF/HF-EPR data |                         |                         |                         |             |
|----|-------------------------------------------------------|---------------------------------------------------|-----------------|-----------------|-----------------|-------------------|------------------|---------------|----------------------|----------------------|----------------------|----------------|-------------------------|-------------------------|-------------------------|-------------|
|    |                                                       |                                                   |                 |                 |                 |                   |                  | <i>D</i>      | <i>g<sub>z</sub></i> | <i>g<sub>x</sub></i> | <i>g<sub>y</sub></i> | <i>Depr</i>    | <i>g<sub>z</sub>epr</i> | <i>g<sub>x</sub>epr</i> | <i>g<sub>y</sub>epr</i> | <i>Eepr</i> |
| 1  | [CoCl <sub>2</sub> (dmpz) <sub>2</sub> ]              | {CoCl <sub>2</sub> N <sub>2</sub> }               | C <sub>2v</sub> | 2.238           | 2.005           | 118.1             | 105.7            | 41.5          | 2.0                  | 2.538                | 2.538                |                |                         |                         |                         |             |
| 2  | [CoCl <sub>2</sub> (ndmiz) <sub>2</sub> ]             | {CoCl <sub>2</sub> N <sub>2</sub> }               | C <sub>2v</sub> | 2.231           | 2.034           | 111.0             | 102.4            | 11.13         | 2.115                | 2.240                | 2.515                | 11.38          | 2.16                    | 2.09                    | 2.37                    | 2.36        |
| 3  | [CoCl <sub>2</sub> (iz) <sub>2</sub> ]                | {CoCl <sub>2</sub> N <sub>2</sub> }               | C <sub>1</sub>  | 2.250           | 1.993           | 111.2             | 105.3            | 5.67          | 2.079                | 2.270                | 2.335                | 9.15           | 2.245                   | 2.245                   | 2.245                   | 1.00        |
| 4  | Hg[Co(NCS) <sub>4</sub> ]                             | single crystal                                    | D <sub>2d</sub> | 1.964           | 1.964           | 113.5             | 113.5            | 5.1           | 2.168                | 2.251                | 2.251                |                |                         |                         |                         |             |
| 4  | Hg[Co(NCS) <sub>4</sub> ]                             | {CoN <sub>4</sub> }                               | D <sub>2d</sub> | 1.964           | 1.964           | 113.5             | 113.5            | 3.86          | 2.223                | 2.292                | 2.292                | 5.50           | 2.20                    | 2.15                    | 2.15                    | 0           |
| 5  | [Co(NCS) <sub>2</sub> (qu) <sub>2</sub> ]             | {CoN <sub>2</sub> N <sub>2</sub> }                | C <sub>1</sub>  | 1.937           | 2.036           | 108.3             | 104.5            | 5.00          | 2.133                | 2.250                | 2.250                |                |                         |                         |                         |             |
| 6  | [CoCl <sub>2</sub> (bziz) <sub>2</sub> ]              | {CoCl <sub>2</sub> N <sub>2</sub> }               | C <sub>1</sub>  | 2.247           | 2.007           | 111.9             | 106.2            | 2.18          | 2.304                | 2.415                | 2.529                | 3.33           | 2.236                   | 2.221                   | 2.24                    | 0.93        |
| 7  | Cs <sub>3</sub> CoCl <sub>5</sub>                     | {CoCl <sub>4</sub> }                              | D <sub>2d</sub> | 2.268           | 2.268           | 107.2             | 107.2            |               |                      |                      |                      | -4.30          | 2.40                    | 2.30                    | 2.30                    |             |
| 8  | [CoCl <sub>2</sub> (ct) <sub>2</sub> ]                | {CoCl <sub>2</sub> N <sub>2</sub> }               | C <sub>1</sub>  | 2.299           | 2.055           | 103.4             | 110.4            | -5.23         | 2.248                | 2.173                | 2.201                | -4.31          | 2.253                   | 2.220                   | 2.233                   | 0.23        |
| 9  | [CoCl <sub>2</sub> (Mepy) <sub>2</sub> ]              | {CoCl <sub>2</sub> N <sub>2</sub> }               | C <sub>1</sub>  | 2.232           | 2.051           | 121.4             | 107.4            | -4.88         | 2.523                | 2.123                | 2.123                |                |                         |                         |                         |             |
| 10 | Cs <sub>3</sub> CoBr <sub>5</sub>                     | {CoBr <sub>4</sub> }                              | D <sub>2d</sub> | 2.399           | 2.399           | 107.6             | 107.6            |               |                      |                      |                      | -5.34          | 2.42                    | 2.32                    | 2.32                    |             |
| 11 | [CoCl <sub>2</sub> (qu) <sub>2</sub> ]                | {CoCl <sub>2</sub> N <sub>2</sub> }               | C <sub>2v</sub> | 2.244           | 2.070           | 113.4             | 107.2            | -6.35         | 2.496                | 2.075                | 2.113                | -5.88          | 2.194                   | 2.210                   | 2.220                   | 1.54        |
| 12 | [CoCl <sub>2</sub> (ampy) <sub>2</sub> ]              | {CoCl <sub>2</sub> N <sub>2</sub> }               | C <sub>2v</sub> | 2.243           | 2.041           | 110.4             | 114.5            | -9.99         | 2.362                | 2.193                | 2.197                | -7.99          | 2.220                   | 2.225                   | 2.246                   | 2.23        |
| 13 | (Hiz) <sub>2</sub> [CoCl <sub>4</sub> ]               | {CoCl <sub>4</sub> }                              | C <sub>1</sub>  | 2.274           | 2.280           | 118.9             | 113.1            | -12.0         | 2.362                | 2.225                | 2.225                |                |                         |                         |                         |             |
| 14 | [Co(PPh <sub>3</sub> ) <sub>2</sub> Cl <sub>2</sub> ] | {CoCl <sub>2</sub> P <sub>2</sub> }               | C <sub>2v</sub> | 2.212           | 2.384           | 117.3             | 115.9            | -11.6         | 2.265                | 2.215                | 2.215                | -14.7          | 2.240                   | 2.168                   | 2.168                   | 1.14        |
| 15 | [Co(PPh <sub>3</sub> ) <sub>2</sub> Br <sub>2</sub> ] | {CoBr <sub>2</sub> P <sub>2</sub> }               | C <sub>2v</sub> | 2.349           | 2.385           | 115.2             | 117.4            | -12.5         | 2.164                | 2.006                | 2.006                |                |                         |                         |                         |             |

Convention:  $g_y > g_x$ .

Data selection for multivariate methods

| No | Compound                                  | Chromophore<br>{CoA <sub>2</sub> B <sub>2</sub> } | <i>R</i> (Co-A) | <i>R</i> (Co-B) | $\alpha$ (A-Co-A) | $\beta$ (B-Co-B) | $(\alpha + \beta)/2$ | $(\alpha - \beta)/2$ | <i>D</i> | <i>g<sub>z</sub></i> | <i>g<sub>x</sub></i> | <i>g<sub>y</sub></i> | <i>g<sub>xy</sub></i> | <i>g<sub>z</sub> - g<sub>xy</sub></i> |
|----|-------------------------------------------|---------------------------------------------------|-----------------|-----------------|-------------------|------------------|----------------------|----------------------|----------|----------------------|----------------------|----------------------|-----------------------|---------------------------------------|
|    | Abbr. →                                   |                                                   | RA              | RB              | alpha             | beta             | Aplus                | Aminus               | D        | gz                   | gx                   | gy                   | gxy                   | gdif                                  |
| 1  | [CoCl <sub>2</sub> (dmpz) <sub>2</sub> ]  | {CoCl <sub>2</sub> N <sub>2</sub> }               | 2.238           | 2.005           | 118.1             | 105.7            | 111.90               | 6.20                 | 41.5     | 2.000                | 2.538                | 2.538                | 2.538                 | -0.538                                |
| 2  | [CoCl <sub>2</sub> (ndmiz) <sub>2</sub> ] | {CoCl <sub>2</sub> N <sub>2</sub> }               | 2.231           | 2.034           | 111.0             | 102.4            | 106.70               | 4.30                 | 11.38    | 2.16                 | 2.09                 | 2.37                 | 2.230                 | -0.070                                |
| 3  | [CoCl <sub>2</sub> (iz) <sub>2</sub> ]    | {CoCl <sub>2</sub> N <sub>2</sub> }               | 2.250           | 1.993           | 111.2             | 105.3            | 108.25               | 2.95                 | 9.15     | 2.245                | 2.245                | 2.245                | 2.245                 | 0.000                                 |
| 4  | Hg[Co(NCS) <sub>4</sub> ]                 | {CoN <sub>4</sub> }                               | 1.964           | 1.964           | 113.5             | 113.5            | 113.50               | 0.00                 | 5.50     | 2.20                 | 2.15                 | 2.15                 | 2.150                 | 0.050                                 |
| 5  | [Co(NCS) <sub>2</sub> (qu) <sub>2</sub> ] | {CoN <sub>2</sub> N <sub>2</sub> }                | 1.937           | 2.036           | 108.3             | 104.5            | 106.40               | 1.90                 | 5.00     | 2.133                | 2.250                | 2.250                | 2.250                 | -0.117                                |
| 6  | [CoCl <sub>2</sub> (bziz) <sub>2</sub> ]  | {CoCl <sub>2</sub> N <sub>2</sub> }               | 2.247           | 2.007           | 111.9             | 106.2            | 109.05               | 2.85                 | 3.33     | 2.236                | 2.221                | 2.24                 | 2.231                 | 0.005                                 |
| 7  | Cs <sub>3</sub> CoCl <sub>5</sub>         | {CoCl <sub>4</sub> }                              | 2.268           | 2.268           | 107.2             | 107.2            | 107.20               | 0.00                 | -4.30    | 2.40                 | 2.30                 | 2.30                 | 2.300                 | 0.100                                 |
| 8  | [CoCl <sub>2</sub> (ct) <sub>2</sub> ]    | {CoCl <sub>2</sub> N <sub>2</sub> }               | 2.299           | 2.055           | 103.4             | 110.4            | 106.90               | -3.50                | -4.31    | 2.253                | 2.220                | 2.233                | 2.227                 | 0.026                                 |
| 9  | [CoCl <sub>2</sub> (Mepy) <sub>2</sub> ]  | {CoCl <sub>2</sub> N <sub>2</sub> }               | 2.232           | 2.051           | 121.4             | 107.4            | 114.40               | 7.00                 | -4.88    | 2.523                | 2.123                | 2.123                | 2.123                 | 0.400                                 |
| 10 | Cs <sub>3</sub> CoBr <sub>5</sub>         | {CoBr <sub>4</sub> }                              | 2.399           | 2.399           | 107.6             | 107.6            | 107.60               | 0.00                 | -5.34    | 2.42                 | 2.32                 | 2.32                 | 2.320                 | 0.100                                 |

|    |                                                       |                                     |       |       |       |       |        |       |       |       |       |       |       |        |
|----|-------------------------------------------------------|-------------------------------------|-------|-------|-------|-------|--------|-------|-------|-------|-------|-------|-------|--------|
| 11 | [CoCl <sub>2</sub> (qu) <sub>2</sub> ]                | {CoCl <sub>2</sub> N <sub>2</sub> } | 2.244 | 2.070 | 113.4 | 107.2 | 110.30 | 3.10  | -5.88 | 2.194 | 2.210 | 2.220 | 2.215 | -0.021 |
| 12 | [CoCl <sub>2</sub> (ampy) <sub>2</sub> ]              | {CoCl <sub>2</sub> N <sub>2</sub> } | 2.243 | 2.041 | 110.4 | 114.5 | 112.45 | -2.05 | -7.99 | 2.220 | 2.225 | 2.246 | 2.236 | -0.015 |
| 13 | (Hiz) <sub>2</sub> [CoCl <sub>4</sub> ]               | {CoCl <sub>4</sub> }                | 2.274 | 2.280 | 118.9 | 113.1 | 116.00 | 2.90  | -12.0 | 2.362 | 2.225 | 2.225 | 2.225 | 0.137  |
| 14 | [Co(PPh <sub>3</sub> ) <sub>2</sub> Br <sub>2</sub> ] | {CoBr <sub>2</sub> P <sub>2</sub> } | 2.349 | 2.385 | 115.2 | 117.4 | 116.30 | -1.10 | -12.5 | 2.164 | 2.006 | 2.006 | 2.006 | 0.158  |
| 15 | [Co(PPh <sub>3</sub> ) <sub>2</sub> Cl <sub>2</sub> ] | {CoCl <sub>2</sub> P <sub>2</sub> } | 2.212 | 2.384 | 117.3 | 115.9 | 116.60 | 0.70  | -14.7 | 2.240 | 2.168 | 2.168 | 2.168 | 0.072  |

Correlation coefficients between variables (15 datapoints)

|        | D       | RA      | RB      | alpha   | beta    | Aplus   | Aminus  | gz      | gxy     |
|--------|---------|---------|---------|---------|---------|---------|---------|---------|---------|
| RA     | -0.2373 |         |         |         |         |         |         |         |         |
| RB     | -0.5852 | 0.5153  |         |         |         |         |         |         |         |
| alpha  | 0.0629  | -0.0189 | 0.0764  |         |         |         |         |         |         |
| beta   | -0.5897 | 0.1113  | 0.4938  | 0.2491  |         |         |         |         |         |
| Aplus  | -0.3167 | 0.0551  | 0.3500  | 0.8089  | 0.7710  |         |         |         |         |
| Aminus | 0.5147  | -0.1031 | -0.3216 | 0.6525  | -0.5713 | 0.0822  |         |         |         |
| gz     | -0.5846 | 0.3329  | 0.3571  | 0.0459  | 0.0529  | 0.0623  | -0.0025 |         |         |
| gxy    | 0.7303  | 0.0506  | -0.2347 | -0.1467 | -0.5328 | -0.4200 | 0.2926  | -0.2845 |         |
| gdif   | -0.8135 | 0.1922  | 0.3737  | 0.1156  | 0.3451  | 0.2856  | -0.1721 | 0.8306  | -0.7702 |

Component weights (PCA analysis)

|        | Component 1 | Component 2 | Component 3 | Component 4 |
|--------|-------------|-------------|-------------|-------------|
| RA     | 0.161       | -0.124      | -0.265      | -0.662      |
| RB     | 0.330       | -0.061      | -0.005      | -0.497      |
| alpha  | 0.093       | 0.663       | -0.117      | -0.054      |
| beta   | 0.367       | 0.131       | 0.470       | -0.105      |
| Aplus  | 0.284       | 0.515       | 0.208       | -0.100      |
| Aminus | -0.208      | 0.459       | -0.467      | 0.036       |
| D      | -0.448      | 0.169       | 0.015       | -0.112      |
| gz     | 0.291       | -0.116      | -0.564      | 0.064       |
| gxy    | -0.374      | -0.035      | -0.084      | -0.430      |
| gdif   | 0.412       | -0.057      | -0.326      | 0.293       |

Tab. S6. PENTACoordinate Co(II) complexes: structural and magnetic parameters [ $\text{\AA}$ , deg,  $\text{cm}^{-1}$ ]

Data for complexes classified as a trigonal bipyramid  $\{\text{Co}(\text{XA}_2)\text{B}_2\}$ , set 1

| No | Complex                                                  | Chromophore<br>$\{\text{CoXA}_2\text{B}_2\}$ | Geometry | Co-X<br>(z) / $\text{\AA}$ | Co-A<br>/ $\text{\AA}$ | Co-B<br>/ $\text{\AA}$ | A-Co-<br>A | B-Co-<br>B | X-Co-<br>A      | X-Co-<br>B       | A-Co-<br>B      | A-Co-<br>B      | $D$<br>/ $\text{cm}^{-1}$ | $E$<br>/ $\text{cm}^{-1}$ | $J$<br>/ $\text{cm}^{-1}$ | $g_{xy}$ |
|----|----------------------------------------------------------|----------------------------------------------|----------|----------------------------|------------------------|------------------------|------------|------------|-----------------|------------------|-----------------|-----------------|---------------------------|---------------------------|---------------------------|----------|
| 1  | $[\text{CoL}^{\text{I}}\text{Cl}_2]$                     | $\{\text{CoNN}_2\text{Cl}_2\}$               | (4py)    | 2.070                      | 2.175<br>2.203         | 2.273<br>2.265         | 147.20     | 113.64     | 74.39<br>74.29  | 107.98<br>138.38 | 97.56<br>99.30  | 98.67<br>100.01 | 71.7                      | 0                         | -                         | 2.51     |
| 2  | $[\text{CoL}^{\text{C7}}\text{Cl}_2]_2$                  | $\{\text{CoNN}_2\text{Cl}_2\}$               | (4py)    | 2.070                      | 2.132<br>2.179         | 2.262<br>2.292         | 145.55     | 112.92     | 74.08<br>74.60  | 100.90<br>146.17 | 96.30<br>101.76 | 94.64<br>105.02 | 151                       | 11.6                      | 1.40                      | 3.28     |
| 3  | $[\text{CoL}^{\text{C10}}\text{Cl}_2]_2$                 | $\{\text{CoNN}_2\text{Cl}_2\}$               | 3bpy     | 2.066                      | 2.130<br>2.154         | 2.285<br>2.269         | 149.97     | 112.07     | 75.04<br>75.25  | 119.22<br>128.71 | 96.70<br>98.42  | 97.54<br>100.58 | 86.4                      | 5.0                       | 1.10                      | 3.06     |
| 4  | $[\text{CoL}^{\text{C12}}\text{Cl}_2]$                   | $\{\text{CoNN}_2\text{Cl}_2\}$               | 3bpy     | 2.061                      | 2.147<br>2.156         | 2.275<br>2.278         | 150.56     | 112.17     | 75.17<br>75.42  | 125.88<br>121.94 | 96.58<br>99.34  | 98.10<br>98.58  | 46.8                      | 0                         | -                         | 2.35     |
| 5  | $[\text{CoL}^{\text{C14}}\text{Cl}_2]_2$                 | $\{\text{Co}(\text{NN}_2)\text{Cl}_2\}$      | (4py)    | 2.085                      | 2.135<br>2.137         | 2.263<br>2.329         | 141.61     | 111.75     | 73.54<br>73.82  | 95.39<br>152.86  | 98.20<br>101.67 | 96.51<br>106.12 | 70.0                      | 4.1                       | 1.47                      | 2.74     |
| 6  | $[\text{Co}(\text{bzimpy})\text{Cl}_2] \cdot \text{DMF}$ | $\{\text{CoNN}_2\text{Cl}_2\}$               | (4py)    | 2.136                      | 2.136<br>2.141         | 2.286<br>2.331         | 146.01     | 111.56     | 74.38<br>74.58  | 101.41<br>147.04 | 98.38<br>100.99 | 98.35<br>100.13 | 61.9                      | 0                         | -                         | 2.34     |
| 7  | $[\text{Co}(\text{terpy})\text{Cl}_2]$                   | $\{\text{CoNN}_2\text{Cl}_2\}$               | (4py)    | 2.074                      | 2.142<br>2.161         | 2.291<br>2.325         | 147.82     | 110.29     | 75.35<br>75.63  | 98.74<br>150.95  | 97.20<br>101.41 | 96.03<br>101.84 | 99.5,<br>calc             | -                         | -                         | (3.157)  |
| 8  | $[\text{Co}(\text{terpy})(\text{NCS})_2]$                | $\{\text{CoNN}_2\text{N}'_2\}$               | 3bpy     | 2.030                      | 2.145<br>2.145         | 1.981<br>1.981         | 154.04     | 103.78     | 77.02<br>77.02  | 128.11<br>128.11 | 93.08<br>102.92 | 93.08<br>102.92 | 49.0,<br>calc             | -                         | -                         | (2.570)  |
| 9  | $[\text{Co}(\text{saldptm})]$                            | $\{\text{CoNN}_2\text{O}_2\}$                | 3bpy     | 2.124                      | 2.045<br>2.054         | 1.952<br>1.944         | 177.11     | 138.63     | 91.44<br>91.36  | 109.68<br>111.69 | 87.78<br>91.95  | 87.58<br>90.72  | 52.0                      | 0                         | -                         | 2.60     |
| 10 | $[\text{Co}(\text{pno})_5](\text{ClO}_4)_2$              | $\{\text{CoOO}_2\text{O}_2\}$                | 3bpy     | 1.989                      | 2.104<br>2.058         | 1.976<br>1.986         | 172.52     | 131.64     | 90.11<br>95.78  | 117.66<br>110.38 | 87.10<br>95.13  | 85.70<br>87.49  | 12.5,<br>epr              | 0                         | -                         | (2.15)   |
| 11 | $[\text{Co}_2(\text{PhCOO})_4(\text{qu})_2]$             | $\{\text{CoNO}_2\text{O}_2\}$                | 4py      | 2.083                      | 2.024<br>2.081         | 2.015<br>2.038         | 163.04     | 162.93     | 92.39<br>104.25 | 96.78<br>99.83   | 86.66<br>88.74  | 86.15<br>93.53  | 67.2                      | 0                         | -1.65                     | 2.14     |

calc – ab initio calculations;  $D = \lambda(g_z - g_{xy})/2$  was used in estimating  $g_{xy}$ ,  $\lambda = -172 \text{ cm}^{-1}$ . epr – estimate by X-band EPR.  $g_z = 2.0$  – fixed.

Data for complexes reclassified as a tetragonal pyramid  $\{\text{CoCl}(\text{N}_3\text{Cl}')\}$ , set 2

| No | Cluster | Complex                                                  | Chromophore                    | Co-Cl<br>(z) | Co-N                    | Co-<br>Cl' | N-Co-<br>N | N'-Co-<br>Cl' | Cl-Co-<br>Cl' | Cl-Co-<br>N' | Cl-Co-<br>N     | $\tau =$<br>$(\alpha - \beta)/60$ | $J$  | $D$  | $E$  | $g_x$ |
|----|---------|----------------------------------------------------------|--------------------------------|--------------|-------------------------|------------|------------|---------------|---------------|--------------|-----------------|-----------------------------------|------|------|------|-------|
|    |         | Abbr. $\rightarrow$                                      | $\{\text{CoClN}_3\text{Cl}'\}$ | Ra           | R3                      | R1         | alpha      | beta          | T1            | T2           | T3              | tau                               | J    | D    | E    | gx    |
| 1  | 1       | $[\text{CoL}^0\text{Cl}_2]$                              | $\{\text{CoClN}_3\text{Cl}'\}$ | 2.265        | 2.070<br>2.175<br>2.203 | 2.273      | 147.20     | 138.38        | 113.64        | 107.98       | 98.67<br>100.01 | 0.15                              | 0    | 71.7 | 0    | 2.51  |
| 2  | 1       | $[\text{CoL}^7\text{Cl}_2]_2$                            | $\{\text{CoClN}_3\text{Cl}'\}$ | 2.292        | 2.070<br>2.132<br>2.179 | 2.262      | 145.55     | 146.17        | 112.92        | 100.90       | 94.64<br>105.02 | 0.01                              | 1.40 | 151  | 11.6 | 3.28  |
| 5  | 1       | $[\text{CoL}^{14}\text{Cl}_2]_2$                         | $\{\text{CoClN}_3\text{Cl}'\}$ | 2.329        | 2.085<br>2.137<br>2.135 | 2.263      | 141.61     | 152.86        | 111.75        | 95.39        | 96.51<br>106.12 | 0.19                              | 1.47 | 70.0 | 4.1  | 2.74  |
| 6  | 1       | $[\text{Co}(\text{bzimpy})\text{Cl}_2] \cdot \text{DMF}$ | $\{\text{CoClN}_3\text{Cl}'\}$ | 2.331        | 2.136<br>2.141<br>2.136 | 2.286      | 146.01     | 147.04        | 111.56        | 101.41       | 98.37<br>100.99 | 0.02                              | 0    | 61.9 | 0    | 2.34  |
| 7  | 1       | $[\text{Co}(\text{terpy})\text{Cl}_2]$                   | $\{\text{CoClN}_3\text{Cl}'\}$ | 2.325        | 2.074<br>2.142<br>2.161 | 2.291      | 147.82     | 150.95        | 110.29        | 98.74        | 96.03<br>101.84 | 0.05                              | 0    | 99.5 | 0    | 3.157 |

|                                                                                   |                                                                                    |                                                                                     |                                                                                     |
|-----------------------------------------------------------------------------------|------------------------------------------------------------------------------------|-------------------------------------------------------------------------------------|-------------------------------------------------------------------------------------|
| 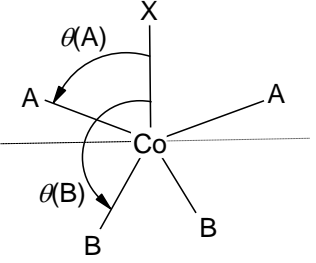 |  |  |  |
| $\theta(A) < 90$ , $\gamma > 180$ , $\tau > 1$                                    | $\theta(A) < \theta(B)$ , $\gamma < 180$ , $\tau < 1$ ,<br>trigonal bipyramid      | $\theta(A) \sim \theta(B)$ , $\gamma < 180$ , $\tau \sim 0$ ,<br>tetragonal pyramid | reclassification to a<br>tetragonal pyramid for set 2                               |

Analysis by SHAPE; agreement factor [S. Alvarez and M. Llunell, *J. Chem. Soc., Dalton Trans.*, 2000, 3288.]

|    | Complex                                                   | Trigonal bipyramid | Square pyramid |
|----|-----------------------------------------------------------|--------------------|----------------|
| 1  | [CoL <sup>0</sup> Cl <sub>2</sub> ]                       | 3.809              | 2.263          |
| 2  | [CoL <sup>7</sup> Cl <sub>2</sub> ]                       | 5.174              | 1.902          |
| 3  | [CoL <sup>10</sup> Cl <sub>2</sub> ]                      | 2.832              | 3.462          |
| 4  | [CoL <sup>12</sup> Cl <sub>2</sub> ]                      | 2.668              | 4.101          |
| 5  | [CoL <sup>14</sup> Cl <sub>2</sub> ]                      | 6.946              | 1.876          |
| 6  | [Co(bzimpy)Cl <sub>2</sub> ]                              | 5.047              | 1.697          |
| 7  | [Co(terpy)Cl <sub>2</sub> ]                               | 5.474              | 1.675          |
| 8  | [Co(terpy)(NCS) <sub>2</sub> ]                            | 2.974              | 4.482          |
| 9  | [Co(saldptm)Cl <sub>2</sub> ]                             | 0.835              | 2.340          |
| 10 | [Co(pno) <sub>5</sub> ]                                   | 0.764              | 3.017          |
| 11 | [Co <sub>2</sub> (PhCOO) <sub>4</sub> (qu) <sub>2</sub> ] | 5.842              | 0.423          |

Data selection for multivariate methods, set 1

| No | Cluster | Complex                                                   | Chromophore                          | Co-X<br>(z) | Co-A  | Co-B  | A-Co-A | B-Co-B | $\theta(A)$ | $\theta(B)$ | $\gamma = 360 - 2\theta(A)$ | $\delta = (\alpha - \beta)/2$ | $\tau$ | D    | $g_x$ | $g_x - g_z$ |
|----|---------|-----------------------------------------------------------|--------------------------------------|-------------|-------|-------|--------|--------|-------------|-------------|-----------------------------|-------------------------------|--------|------|-------|-------------|
|    |         | Abbr. →                                                   | {CoXA <sub>2</sub> B <sub>2</sub> }  | RX          | RA    | RB    | alpha  | beta   | thetaA      | thetaB      | gamma                       | delta                         | tau    | D    | gx    | gdif        |
| 1  | 1       | [CoL <sup>0</sup> Cl <sub>2</sub> ]                       | {CoNN <sub>2</sub> Cl <sub>2</sub> } | 2.070       | 2.189 | 2.269 | 147.20 | 113.64 | 74.34       | 123.18      | 211.32                      | 16.78                         | 1.65   | 71.7 | 2.51  | 0.51        |
| 2  | 1       | [CoL <sup>7</sup> Cl <sub>2</sub> ] <sub>2</sub>          | {CoNN <sub>2</sub> Cl <sub>2</sub> } | 2.070       | 2.155 | 2.277 | 145.55 | 112.92 | 74.34       | 123.53      | 211.32                      | 16.31                         | 1.69   | 151  | 3.28  | 1.28        |
| 3  | 1       | [CoL <sup>10</sup> Cl <sub>2</sub> ] <sub>2</sub>         | {CoNN <sub>2</sub> Cl <sub>2</sub> } | 2.066       | 2.142 | 2.277 | 149.97 | 112.07 | 75.14       | 123.96      | 209.72                      | 18.95                         | 1.63   | 86.4 | 3.06  | 1.06        |
| 4  | 1       | [CoL <sup>12</sup> Cl <sub>2</sub> ]                      | {CoNN <sub>2</sub> Cl <sub>2</sub> } | 2.061       | 2.151 | 2.276 | 150.56 | 112.17 | 75.29       | 123.91      | 209.42                      | 19.19                         | 1.62   | 46.8 | 2.35  | 0.25        |
| 5  | 1       | [CoL <sup>14</sup> Cl <sub>2</sub> ] <sub>2</sub>         | {CoNN <sub>2</sub> Cl <sub>2</sub> } | 2.085       | 2.136 | 2.296 | 141.61 | 111.75 | 73.68       | 124.12      | 212.64                      | 14.93                         | 1.78   | 70.0 | 2.74  | 0.74        |
| 6  | 1       | [Co(bzimpy)Cl <sub>2</sub> ]·DMF                          | {CoNN <sub>2</sub> Cl <sub>2</sub> } | 2.136       | 2.138 | 2.308 | 146.01 | 111.56 | 74.48       | 124.22      | 211.04                      | 17.22                         | 1.71   | 61.9 | 2.34  | 0.34        |
| 7  | 1       | [Co(terpy)Cl <sub>2</sub> ]                               | {CoNN <sub>2</sub> Cl <sub>2</sub> } | 2.074       | 2.151 | 2.308 | 147.82 | 110.29 | 75.49       | 124.84      | 209.02                      | 18.76                         | 1.70   | 99.5 | 3.16  | 1.16        |
| 8  | 1       | [Co(terpy)(NCS) <sub>2</sub> ]                            | {CoNN <sub>2</sub> N' <sub>2</sub> } | 2.030       | 2.145 | 1.981 | 154.04 | 103.78 | 77.02       | 128.11      | 205.96                      | 25.13                         | 1.70   | 49.0 | 2.57  | 0.57        |
| 9  | 2       | [Co(saldptm)]                                             | {CoNN <sub>2</sub> O <sub>2</sub> }  | 2.124       | 2.049 | 1.948 | 177.11 | 138.63 | 91.40       | 110.68      | 177.20                      | 19.24                         | 0.64   | 52.0 | 2.60  | 0.60        |
| 10 | 2       | [Co(pno) <sub>5</sub> ](ClO <sub>4</sub> ) <sub>2</sub>   | {CoOO <sub>2</sub> O <sub>2</sub> }  | 1.989       | 2.081 | 1.981 | 172.52 | 131.64 | 92.94       | 114.02      | 174.12                      | 20.44                         | 0.68   | 12.5 | 2.15  | 0.15        |
| 11 | 2       | [Co <sub>2</sub> (PhCOO) <sub>4</sub> (qu) <sub>2</sub> ] | {CoNO <sub>2</sub> O <sub>2</sub> }  | 2.083       | 2.052 | 2.026 | 163.04 | 162.93 | 98.32       | 98.30       | 163.36                      | 0.05                          | 0      | 67.2 | 2.14  | 0.14        |

Trigonality parameter  $\tau = (\alpha - \beta)/60$ ;  $\tau = 1$  for an ideal trigonal bipyramid and  $\tau = 0$  for an ideal square pyramid; for rigid tridentate ligands  $\tau = (\gamma - \beta)/60 > 1$  where  $\gamma = 360 - \alpha$ .

Data selection for multivariate methods, set 2

| No | Cluster | Complex                                                   | Chromophore                          | Co-Cl (z) | Co-N  | Co-Cl' | N-Co-N' | N'-Co-Cl' | $\tau =  \alpha - \beta /60$ | D    | $g_x$ | $g_x - g_z$ |
|----|---------|-----------------------------------------------------------|--------------------------------------|-----------|-------|--------|---------|-----------|------------------------------|------|-------|-------------|
|    |         |                                                           | {CoXA <sub>2</sub> B <sub>2</sub> }  | Co-X (z)  | Co-A  | Co-B   | A-Co-A  | B-Co-B    |                              |      |       |             |
|    |         | Abbr. →                                                   | {CoClN <sub>3</sub> Cl'}             | RX        | RA    | RB     | alpha   | beta      | tau                          | D    | gx    | gdif        |
| 1  | 1       | [CoL <sup>0</sup> Cl <sub>2</sub> ]                       | {CoClN <sub>3</sub> Cl'}             | 2.265     |       | 2.273  | 147.20  | 138.38    | 0.15                         | 71.7 | 2.51  | 0.51        |
| 2  | 1       | [CoL <sup>7</sup> Cl <sub>2</sub> ] <sub>2</sub>          | {CoClN <sub>3</sub> Cl'}             | 2.292     |       |        | 145.55  | 146.17    | 0.01                         | 151  | 3.28  | 1.28        |
| 3  | 1       | [CoL <sup>10</sup> Cl <sub>2</sub> ] <sub>2</sub>         | {CoNN <sub>2</sub> Cl <sub>2</sub> } | 2.066     | 2.142 | 2.277  | 149.97  | 112.07    | 1.63                         | 86.4 | 3.06  | 1.06        |
| 4  | 1       | [CoL <sup>12</sup> Cl <sub>2</sub> ]                      | {CoNN <sub>2</sub> Cl <sub>2</sub> } | 2.061     | 2.151 | 2.276  | 150.56  | 112.17    | 1.62                         | 46.8 | 2.35  | 0.25        |
| 5  | 1       | [CoL <sup>14</sup> Cl <sub>2</sub> ] <sub>2</sub>         | {CoClN <sub>3</sub> Cl'}             |           |       |        | 141.61  | 152.86    | 0.19                         | 70.0 | 2.74  | 0.74        |
| 6  | 1       | [Co(bzimpy)Cl <sub>2</sub> ]·DMF                          | {CoClN <sub>3</sub> Cl'}             |           |       |        | 146.01  | 147.04    | 0.02                         | 61.9 | 2.34  | 0.34        |
| 7  | 1       | [Co(terpy)Cl <sub>2</sub> ]                               | {CoClN <sub>3</sub> Cl'}             |           |       |        | 147.82  | 150.95    | 0.05                         | 99.5 | 3.157 | 1.16        |
| 8  | 1       | [Co(terpy)(NCS) <sub>2</sub> ]                            | {CoNN <sub>2</sub> N' <sub>2</sub> } | 2.030     | 2.145 | 1.981  | 154.04  | 103.78    | 1.70                         | 49.0 | 2.570 | 0.57        |
| 9  | 2       | [Co(saldptm)]                                             | {CoNN <sub>2</sub> O <sub>2</sub> }  | 2.124     | 2.049 | 1.948  | 177.11  | 138.63    | 0.64                         | 52.0 | 2.60  | 0.60        |
| 10 | 2       | [Co(pno) <sub>5</sub> ](ClO <sub>4</sub> ) <sub>2</sub>   | {CoOO <sub>2</sub> O <sub>2</sub> }  | 1.989     | 2.081 | 1.981  | 172.52  | 131.64    | 0.68                         | 12.5 | 2.15  | 0.15        |
| 11 | 2       | [Co <sub>2</sub> (PhCOO) <sub>4</sub> (qu) <sub>2</sub> ] | {CoNO <sub>2</sub> O <sub>2</sub> }  | 2.083     | 2.052 | 2.026  | 163.04  | 162.93    | 0                            | 67.2 | 2.14  | 0.14        |

Correlation coefficients between variables (11 datapoints), set 1

|        | D       | gx      | RX      | RA      | RB      | alpha   | beta    | thetaA  | thetaB | gamma  | tau    |
|--------|---------|---------|---------|---------|---------|---------|---------|---------|--------|--------|--------|
| gx     | 0.8278  |         |         |         |         |         |         |         |        |        |        |
| RX     | 0.3005  | 0.1195  |         |         |         |         |         |         |        |        |        |
| RA     | 0.4133  | 0.4562  | -0.0826 |         |         |         |         |         |        |        |        |
| RB     | 0.5577  | 0.4934  | 0.3091  | 0.7561  |         |         |         |         |        |        |        |
| alpha  | -0.5621 | -0.4741 | -0.1783 | -0.8516 | -0.8790 |         |         |         |        |        |        |
| beta   | -0.2502 | -0.5079 | 0.0936  | -0.8649 | -0.5968 | 0.7012  |         |         |        |        |        |
| thetaA | -0.4535 | -0.5700 | -0.1351 | -0.9256 | -0.8063 | 0.8791  | 0.9328  |         |        |        |        |
| thetaB | 0.2511  | 0.5091  | -0.0899 | 0.8644  | 0.5969  | -0.7006 | -1.0000 | -0.9332 |        |        |        |
| gamma  | 0.4535  | 0.5700  | 0.1351  | 0.9256  | 0.8063  | -0.8791 | -0.9328 | -1.0000 | 0.9332 |        |        |
| tau    | 0.3812  | 0.5605  | 0.0517  | 0.9075  | 0.7345  | -0.8234 | -0.9755 | -0.9877 | 0.9758 | 0.9877 |        |
| dis    | -0.1765 | 0.2671  | -0.2984 | 0.4133  | 0.0119  | -0.0448 | -0.7436 | -0.4826 | 0.7442 | 0.4826 | 0.5948 |

Component weights (PCA analysis), set 1

|        | Component 1 | Component 2 |
|--------|-------------|-------------|
| RX     | -0.028      | 0.453       |
| RA     | -0.330      | -0.047      |
| RB     | -0.286      | 0.285       |
| alpha  | 0.309       | -0.213      |
| beta   | 0.333       | 0.231       |
| gamma  | -0.353      | -0.003      |
| thetaA | 0.353       | 0.003       |
| thetaB | -0.333      | -0.230      |
| tau    | -0.350      | -0.092      |
| D      | -0.182      | 0.475       |
| gx     | -0.229      | 0.218       |
| dis    | -0.176      | -0.525      |
